# Supplementary material for: A genome-wide CRISPR/Cas9 screen in acute myeloid leukemia cells identifies regulators of TAK-243 sensitivity
Source: PubMed Central journal article supplement (PMC8021101; doi:10.1172/jci.insight.141518), 2021-03-08
Supplement: jciinsight-6-141518-s053.pdf [file jciinsight-6-141518-s053.pdf]

**A genome-wide CRISPR/Cas9 screen in acute myeloid leukemia cells identifies regulators of TAK-243 sensitivity**

Samir H. Barghout<sup>1,2,3</sup>, Ahmed Aman<sup>4,5</sup>, Kazem Nouri<sup>1</sup>, Zachary Blatman<sup>1,6</sup>, Karen Arevalo<sup>1,6</sup>, Geethu Thomas<sup>1</sup>, Neil MacLean<sup>1</sup>, Rose Hurren<sup>1</sup>, Troy Ketela<sup>1</sup>, Mehakpreet Saini<sup>4</sup>, Moustafa Abohawya<sup>7</sup>, Taira Kiyota<sup>4</sup>, Rima Al-Awar<sup>4,8</sup>, and Aaron D. Schimmer<sup>1,2,6\*</sup>

<sup>1</sup>Princess Margaret Cancer Centre, University Health Network, Toronto, ON, Canada;

<sup>2</sup>Department of Medical Biophysics, Faculty of Medicine, University of Toronto, Toronto, ON, Canada;

<sup>3</sup>Department of Pharmacology & Toxicology, Faculty of Pharmacy, Tanta University, Tanta; Egypt;

<sup>4</sup>Drug Discovery Program, Ontario Institute for Cancer Research, Toronto, ON, Canada;

<sup>5</sup>Leslie Dan Faculty of Pharmacy, University of Toronto, Toronto, ON, Canada;

<sup>6</sup>Institute of Medical Science, Faculty of Medicine, University of Toronto, Toronto, ON, Canada;

<sup>7</sup>Department of Biomedical Sciences, Zewail City of Science and Technology, Giza, Egypt;

<sup>8</sup>Department of Pharmacology & Toxicology, University of Toronto, Toronto, ON, Canada.

\* Corresponding author:

Dr. Aaron D. Schimmer

Princess Margaret Cancer Research Tower, Room 8-706

101 College St, Toronto, ON, M5G 1L7, Canada.

Tel: 416-946-2838

E-mail: aaron.schimmer@uhn.ca

**Running title:** Regulators of TAK-243 sensitivity

**Key words:** TAK-243; UBA1; Ubiquitin; AML; BEND3; ABCG2; ABC transporters; Anticancer drug sensitivity

**Table S1 Top hits in the IC<sub>90</sub> arm of the CRISPR/Cas9 knockout screen as assessed by the MAGeCK algorithm**

| <b>Rank</b> | <b>Gene</b> | <b>Number</b> | <b>Score</b> | <b><i>p</i>-value</b> | <b>FDR</b> | <b>Good gRNA</b> |
|-------------|-------------|---------------|--------------|-----------------------|------------|------------------|
| 1           | BEND3       | 6             | 6.55E-21     | 2.87E-07              | 0.001238   | 6                |
| 2           | FLCN        | 6             | 7.30E-13     | 2.87E-07              | 0.001238   | 6                |
| 3           | SUV420H1    | 6             | 3.83E-11     | 2.87E-07              | 0.001238   | 5                |
| 4           | DAZAP1      | 6             | 7.16E-11     | 2.87E-07              | 0.001238   | 6                |
| 5           | FBXL20      | 6             | 2.19E-08     | 8.62E-07              | 0.002475   | 6                |
| 6           | EPC2        | 6             | 2.87E-08     | 8.62E-07              | 0.002475   | 4                |
| 7           | CDK2        | 6             | 6.33E-08     | 1.44E-06              | 0.003536   | 6                |
| 8           | ZNF800      | 5             | 2.48E-07     | 2.58E-06              | 0.005569   | 4                |
| 9           | BAHD1       | 6             | 7.91E-07     | 5.46E-06              | 0.010451   | 6                |
| 10          | RC3H1       | 6             | 1.55E-06     | 1.12E-05              | 0.014851   | 5                |
| 11          | RRAGA       | 6             | 1.64E-06     | 1.12E-05              | 0.014851   | 6                |
| 12          | ZNF787      | 6             | 1.67E-06     | 1.12E-05              | 0.014851   | 6                |
| 13          | HDAC1       | 6             | 5.85E-06     | 3.30E-05              | 0.040594   | 6                |
| 14          | LINS        | 6             | 6.18E-06     | 3.53E-05              | 0.040594   | 6                |
| 15          | FOXP3       | 6             | 1.03E-05     | 5.00E-05              | 0.053837   | 4                |
| 16          | SFMBT2      | 6             | 1.18E-05     | 5.95E-05              | 0.058581   | 5                |
| 17          | ACSL4       | 6             | 1.25E-05     | 6.12E-05              | 0.058581   | 6                |
| 18          | QKI         | 6             | 2.70E-05     | 0.000123              | 0.109586   | 5                |
| 19          | ZFR         | 6             | 2.81E-05     | 0.00013               | 0.109586   | 5                |
| 20          | TFPI2       | 6             | 2.95E-05     | 0.000136              | 0.109586   | 6                |
| 21          | CCDC43      | 6             | 3.00E-05     | 0.00014               | 0.109586   | 6                |
| 22          | DROSHA      | 6             | 3.95E-05     | 0.000193              | 0.144641   | 3                |
| 23          | UBE2F       | 3             | 5.17E-05     | 0.000254              | 0.18255    | 3                |
| 24          | SRM         | 6             | 5.65E-05     | 0.000277              | 0.187069   | 4                |
| 25          | MAT2B       | 6             | 5.86E-05     | 0.000285              | 0.187069   | 6                |
| 26          | SMAD7       | 6             | 6.22E-05     | 0.000296              | 0.187069   | 6                |
| 27          | SLC30A10    | 6             | 6.88E-05     | 0.000333              | 0.187069   | 4                |
| 28          | CALHM3      | 6             | 7.09E-05     | 0.000339              | 0.187069   | 4                |
| 29          | TIAL1       | 6             | 7.15E-05     | 0.000341              | 0.187069   | 5                |
| 30          | SAFB2       | 6             | 7.33E-05     | 0.000346              | 0.187069   | 5                |
| 31          | AZIN1       | 3             | 7.57E-05     | 0.000357              | 0.187069   | 3                |
| 32          | HEXB        | 6             | 7.59E-05     | 0.000358              | 0.187069   | 3                |
| 33          | ZC3HAV1     | 6             | 8.32E-05     | 0.000386              | 0.195836   | 6                |

Good guide RNAs (gRNAs): gRNAs whose ranking is below the alpha cutoff; Score: Robust Ranking Aggregation (RRA) algorithm score of enriched/depleted gRNAs; FDR: False discovery rate

**Table S2 Top hits in the IC<sub>99</sub> arm of the CRISPR/Cas9 knockout screen as assessed by the MAGeCK algorithm**

| <b>Rank</b> | <b>Gene</b> | <b>Number</b> | <b>Score</b> | <b><i>p</i>-value</b> | <b>FDR</b> | <b>Good gRNA</b> |
|-------------|-------------|---------------|--------------|-----------------------|------------|------------------|
| <b>1</b>    | BEND3       | 6             | 1.03E-19     | 2.87E-07              | 0.001238   | 6                |
| <b>2</b>    | SUV420H1    | 6             | 4.47E-12     | 2.87E-07              | 0.001238   | 4                |
| <b>3</b>    | DAZAP1      | 6             | 1.23E-10     | 2.87E-07              | 0.001238   | 5                |
| <b>4</b>    | CDK2        | 6             | 2.13E-09     | 2.87E-07              | 0.001238   | 5                |
| <b>5</b>    | TIAL1       | 6             | 3.58E-07     | 1.44E-06              | 0.00495    | 4                |
| <b>6</b>    | ACSL4       | 6             | 1.18E-06     | 3.73E-06              | 0.010726   | 4                |
| <b>7</b>    | OPRK1       | 6             | 9.33E-06     | 2.50E-05              | 0.061528   | 3                |
| <b>8</b>    | RRAGA       | 6             | 2.27E-05     | 6.17E-05              | 0.133045   | 3                |
| <b>9</b>    | FLCN        | 6             | 2.79E-05     | 7.50E-05              | 0.143564   | 3                |
| <b>10</b>   | EIF4G1      | 6             | 3.98E-05     | 0.000101              | 0.174752   | 3                |
| <b>11</b>   | SAFB2       | 6             | 5.01E-05     | 0.000124              | 0.193969   | 3                |

**Table S3 TAK-243 sensitivity data**

| #  | Cell Line                                   | TAK-243 IC <sub>50</sub> (nM)* |
|----|---------------------------------------------|--------------------------------|
| 1  | NCIH82_LUNG                                 | 6                              |
| 2  | K562_HAEMATOPOIETIC_AND_LYMPHOID_TISSUE     | 9                              |
| 3  | NB4_HAEMATOPOIETIC_AND_LYMPHOID_TISSUE      | 10                             |
| 4  | JURKAT_HAEMATOPOIETIC_AND_LYMPHOID_TISSUE   | 10                             |
| 5  | NCIH69_LUNG                                 | 11                             |
| 6  | MM1S_HAEMATOPOIETIC_AND_LYMPHOID_TISSUE     | 12                             |
| 7  | NCIH520_LUNG                                | 13                             |
| 8  | MV411_HAEMATOPOIETIC_AND_LYMPHOID_TISSUE    | 15                             |
| 9  | WSUDLCL2_HAEMATOPOIETIC_AND_LYMPHOID_TISSUE | 16                             |
| 10 | HL60_HAEMATOPOIETIC_AND_LYMPHOID_TISSUE     | 17                             |
| 11 | U937_HAEMATOPOIETIC_AND_LYMPHOID_TISSUE     | 17                             |
| 12 | THP1_HAEMATOPOIETIC_AND_LYMPHOID_TISSUE     | 19                             |
| 13 | HCT116_LARGE_INTESTINE                      | 20                             |
| 14 | OCIAML2_HAEMATOPOIETIC_AND_LYMPHOID_TISSUE  | 27                             |
| 15 | SW480_LARGE_INTESTINE                       | 44                             |
| 16 | U266B1_HAEMATOPOIETIC_AND_LYMPHOID_TISSUE   | 44                             |
| 17 | MIAPACA2_PANCREAS                           | 45                             |
| 18 | SW48_LARGE_INTESTINE                        | 56                             |
| 19 | HEPG2_LIVER                                 | 60                             |
| 20 | NCIH929_HAEMATOPOIETIC_AND_LYMPHOID_TISSUE  | 109                            |
| 21 | HCC1954_BREAST                              | 123                            |
| 22 | MDAMB231_BREAST                             | 172                            |
| 23 | CALU6_LUNG                                  | 174                            |
| 24 | HT29_LARGE_INTESTINE                        | 308                            |
| 25 | MCF7_BREAST                                 | 360                            |
| 26 | A375_SKIN                                   | 381                            |
| 27 | LOVO_LARGE_INTESTINE                        | 450                            |
| 28 | A549_LUNG                                   | 1187                           |
| 29 | NCIH460_LUNG                                | 1310                           |
| 30 | RPMI8226_HAEMATOPOIETIC_AND_LYMPHOID_TISSUE | 1366                           |

Sensitivity data were obtained from Ref. (1), Ref. (2) and experimental data from our laboratory

**Table S4 Sequences of *BEND3*-targeting gRNAs and *ABCG2* mRNA-targeting shRNAs**

| <b>ID</b>                            | <b>Sequence (5'→3')</b> |
|--------------------------------------|-------------------------|
| <b><i>BEND3</i>-targeting gRNAs</b>  |                         |
| <b>gBEND3 #1</b>                     | TCAGGAGCCGCAGTGACGAG    |
| <b>gBEND3 #2</b>                     | GGATGAGCTTGATGCGGGAG    |
| <b>crV2 BEND3 #1</b>                 | GGATGAGCTTGATGCGGGAG    |
| <b>crV2 BEND3 #2</b>                 | TGAACAGTACAGCTGCTACG    |
| <b>crV2 BEND3 #3</b>                 | AGTAGACCTCCACATAGTTG    |
| <b><i>ABCG2</i>-targeting shRNAs</b> |                         |
| <b>shABCG2 #1</b>                    | CCTGCCAATTTCAAATGTAAT   |
| <b>shABCG2 #2</b>                    | TAACATCTGCTATCGAGTAAA   |

**Table S5 Primers used for RT-qPCR**

| <b>ID</b>           | <b>F/R</b> | <b>Sequence (5'→3')</b> |
|---------------------|------------|-------------------------|
| <b><i>ABCG2</i></b> | F          | GTGGCCTTGGCTTGTATGAT    |
| <b>(BCRP)</b>       | R          | GATGGCAAGGGAACAGAAAA    |
| <b><i>ABCB1</i></b> | F          | GCTCCTGACTATGCCAAAGC    |
| <b>(P-gp)</b>       | R          | TCTTCACCTCCAGGCTCAGT    |
| <b><i>ABCC2</i></b> | F          | TGCTTCCTGGGGATAATCAG    |
| <b>(MRP2)</b>       | R          | CACGGATAACTGGCAAACCT    |

**Table S6 Antibodies used in Western blotting, their sources and dilution**

| Primary antibody                | Source         | Clone   | Catalog#   | Dilution                                |
|---------------------------------|----------------|---------|------------|-----------------------------------------|
| ABCG2/BCRP                      | Cell Signaling | D5V2K   | 42078S     | Primary: 1:1000<br>Secondary: 1:1000    |
| ATF4                            | Santa Cruz     | C-20    | sc-200     | Primary: 1:100<br>Secondary: 1:1000     |
| BEND3                           | Proteintech    | -       | 23101-1-AP | Primary: 1:500<br>Secondary: 1:1000     |
| Cas9                            | Cell Signaling | 7A9-3A3 | 14697      | Primary: 1:1000<br>Secondary: 1:1000    |
| CHOP                            | Sigma          | -       | G6916      | Primary: 1:500<br>Secondary: 1:1000     |
| GAPDH                           | Cell Signaling | 14C10   | 2118       | Primary: 1:4000<br>Secondary: 1:2000    |
| PARP                            | Cell Signaling | -       | 9542       | Primary: 1:1000<br>Secondary: 1:1000    |
| p-JNK <sup>Thr183/Tyr185</sup>  | Cell Signaling | -       | 9251       | Primary: 1:1000<br>Secondary: 1:1000    |
| UBA1                            | Santa Cruz     | 2G2     | sc-53555   | Primary: 1:300<br>Secondary: 1:1000     |
| UBA2                            | Santa Cruz     | 28      | sc-136359  | Primary: 1:500<br>Secondary: 1:1000     |
| UBA3                            | Santa Cruz     | E-5     | sc-377272  | Primary: 1:400<br>Secondary: 1:1000     |
| UBA6                            | Cell Signaling | -       | 13386      | Primary: 1:1000<br>Secondary: 1:1000    |
| Ubiquitin                       | Cell Signaling | -       | 3933       | Primary: 1: 500<br>Secondary: 1:1000    |
| Ubiquityl-Histone H2A (Lys119)  | Cell Signaling | D27C4   | 8240       | Primary: 1:1000<br>Secondary: 1:1000    |
| $\beta$ -actin                  | Santa Cruz     | AC-15   | sc-69879   | Primary: 1:10,000<br>Secondary: 1:5,000 |
| $\gamma$ H2AX <sup>Ser139</sup> | EMD Millipore  | JBW301  | 05-636     | Primary: 1:600<br>Secondary: 1:1000     |

### Supplementary References

1. Hyer ML, Milhollen MA, Ciavarrri J, Fleming P, Traore T, Sappal D, et al. A small-molecule inhibitor of the ubiquitin activating enzyme for cancer treatment. *Nature medicine*. 2018;24(2):186-93.
2. Zhuang J, Shirazi F, Singh RK, Kuiatse I, Wang H, Lee HC, et al. Ubiquitin-activating enzyme inhibition induces an unfolded protein response and overcomes drug resistance in myeloma. *Blood*. 2019.

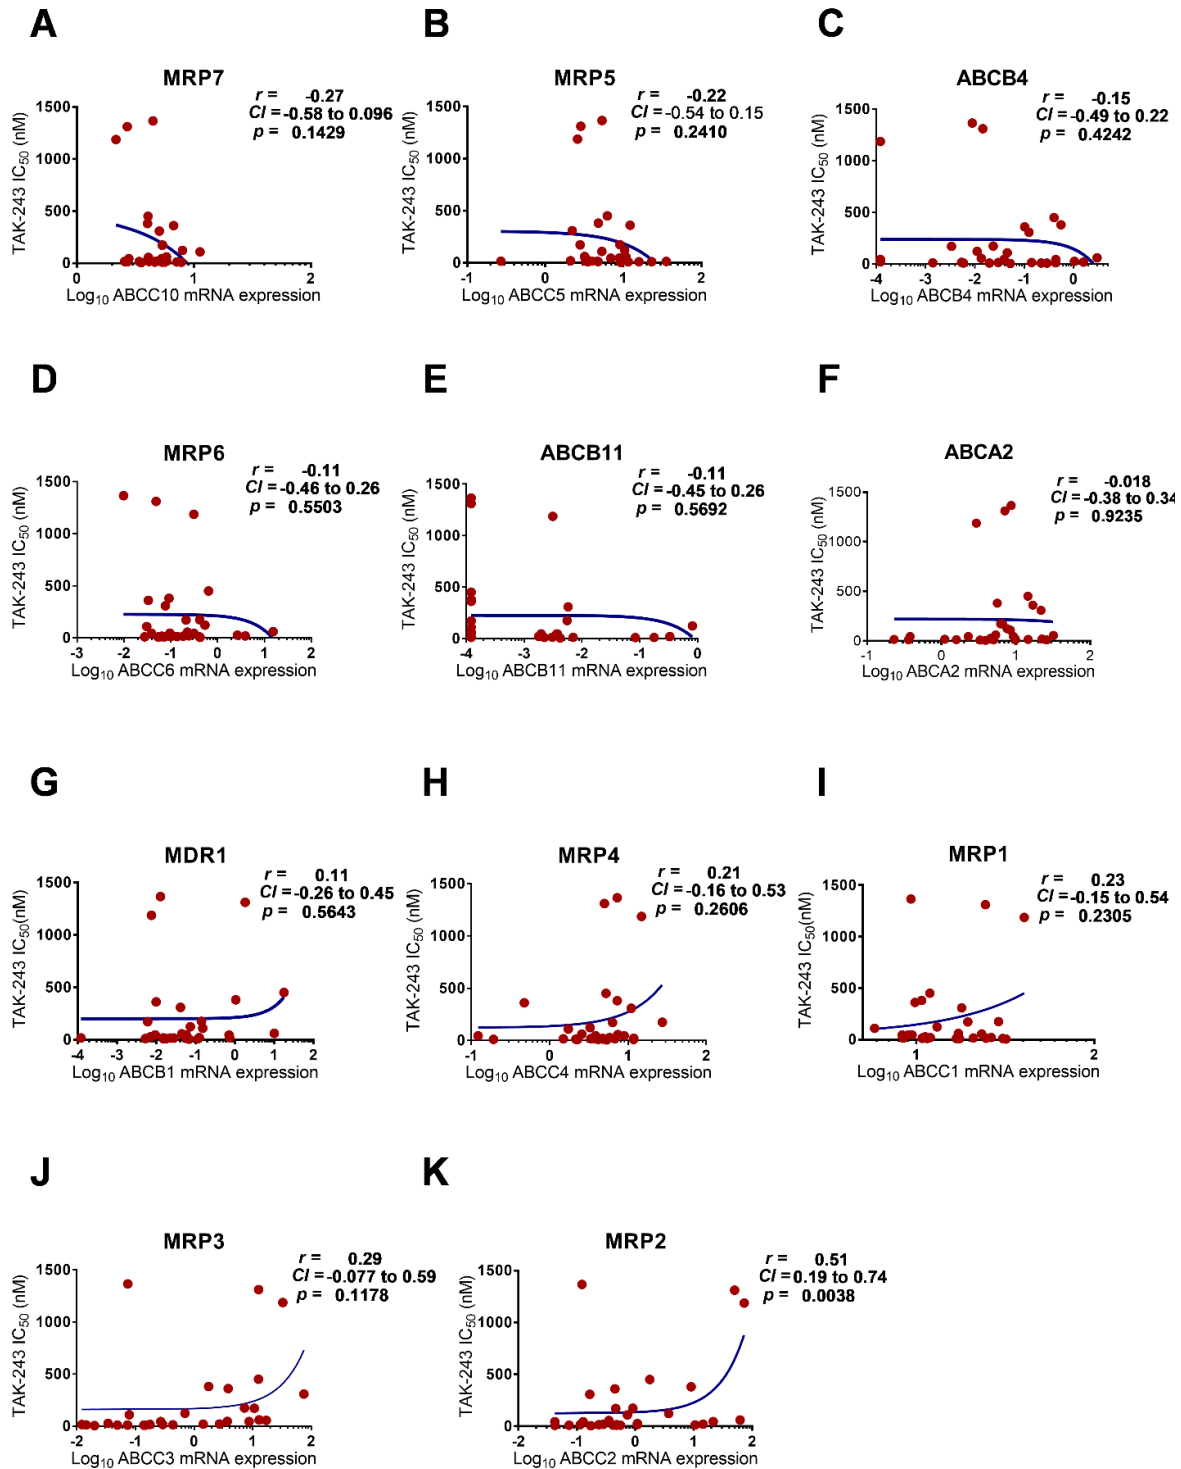

**Figure S1 Correlation of ABC transporter expression and TAK-243 sensitivity.** A-K) Correlation curves of the mRNA expression of ABC transporters commonly involved in drug multidrug resistance and TAK-243 sensitivity (as measured by  $IC_{50}$ ). Data points represent the 30 cell lines used in the analysis. A logarithmic scale was used for the X-axis to display all the data points over a wide range. Insert: the Pearson correlation coefficient ( $r$ ), confidence interval ( $CI$ ) and significance of correlation (as assessed by  $p$  value). Transporter names are shown on the graphs.



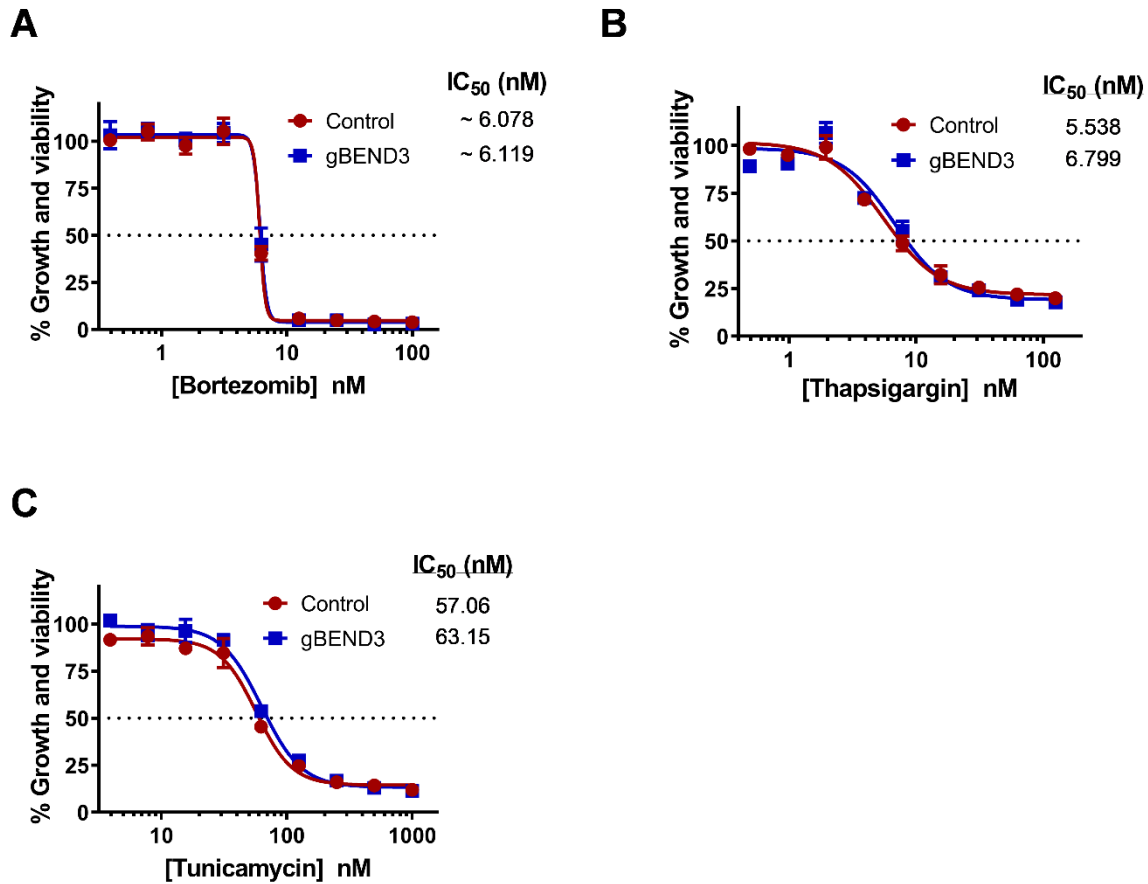

**Figure S2** *BEND3* knockout does not affect response to proteasome inhibitors or ER stressors. A-C) Control and *BEND3* knockout OCI-AML2-Cas9 cells were treated with increasing concentrations of bortezomib (A), thapsigargin (B), and tunicamycin (C) for 72 h. Cell growth and viability was measured by the MTS assay. Insert: the IC<sub>50</sub> values (nM) are shown. Data points represent means ± SEM of at least 3 independent experiments.
